# Supplementary material for: Multi-resolution independent component analysis for high-performance tumor classification and biomarker discovery
Source: PubMed Central journal article supplement (PMC3044315; doi:10.1186/1471-2105-12-s1-s7), 2011-02-15
Supplement: 1471-2105-12-S1-S7-S2.pdf [file 1471-2105-12-S1-S7-S2.pdf]

## Supplemental Information (2)

MICA-LDA algorithm performance on 100 trials of 50% HOCV and 10-fold CV

| Dataset           | Avg. classification rate $\pm$ std (%) | Avg. sensitivity $\pm$ std (%) | Avg. specificity $\pm$ std (%) |
|-------------------|----------------------------------------|--------------------------------|--------------------------------|
| <b>50%HOCV</b>    |                                        |                                |                                |
| Stroma            | 85.39 $\pm$ 06.26                      | 92.55 $\pm$ 06.88              | 70.29 $\pm$ 28.72              |
| Breast_1          | 97.64 $\pm$ 01.50                      | 98.03 $\pm$ 01.88              | 96.57 $\pm$ 03.74              |
| Prostate          | 88.37 $\pm$ 06.87                      | 84.90 $\pm$ 08.44              | 93.19 $\pm$ 09.65              |
| Glioma            | 95.00 $\pm$ 11.25                      | 93.33 $\pm$ 21.08              | 96.67 $\pm$ 10.54              |
| HCC               | 84.17 $\pm$ 09.25                      | 88.23 $\pm$ 11.44              | 76.76 $\pm$ 17.52              |
| Breast_2          | 91.92 $\pm$ 04.17                      | 90.91 $\pm$ 07.51              | 93.24 $\pm$ 05.10              |
| <b>10-fold CV</b> |                                        |                                |                                |
| Stroma            | 87.50 $\pm$ 14.39                      | 89.17 $\pm$ 18.45              | 85.00 $\pm$ 33.75              |
| Breast_1          | 98.14 $\pm$ 02.40                      | 98.16 $\pm$ 02.96              | 98.33 $\pm$ 05.27              |
| Prostate          | 93.52 $\pm$ 06.26                      | 89.82 $\pm$ 07.99              | 98.33 $\pm$ 05.27              |
| Glioma            | 95.00 $\pm$ 11.25                      | 93.33 $\pm$ 21.08              | 96.67 $\pm$ 10.54              |
| HCC               | 91.67 $\pm$ 11.79                      | 90.00 $\pm$ 17.48              | 95.00 $\pm$ 15.81              |
| Breast_2          | 93.78 $\pm$ 05.37                      | 96.00 $\pm$ 08.43              | 91.00 $\pm$ 11.74              |
